# Supplementary material for: Response of sludge fermentation liquid and microbial community to nano zero-valent iron exposure in a mesophilic anaerobic digestion system
Source: Royal Society of Chemistry journal article supplement (doi:10.1039/c6ra02591a), 2016-01-01
Supplement: c6ra02591a1.pdf [file c6ra02591a1.pdf]

## Supporting Materials

### Response of sludge fermentation liquid and microbial community to nano zero-valent iron exposure in mesophilic anaerobic digestion system

Bao Yu, Xiaoting Huang, Dongling Zhang, Ziyang Lou, Haiping Yuan, Nanwen Zhu\*

*School of Environmental Science and Engineering, Shanghai Jiao Tong University, Shanghai  
200240, China*

#### Figure Captions:

**Figure S1:** Transmission electron microscopic (TEM) images of NZVI.

**Figure S2:** The cumulative H<sub>2</sub> partial pressure vs. fermentation time.

**Figure S3:** Variations of pH vs. fermentation time.

**Figure S4:** The EEM spectra of DOM during the AD process.

Corresponding to four stages: 0<sup>th</sup> (initial stage), 3<sup>rd</sup> day (when highest VFAs accumulation was achieved), 17<sup>th</sup> day (intermediate stage) and 32<sup>nd</sup> day (terminal stage).

---

\* Corresponding author. Tel.: +86021 34203710; fax: +86021 34203710.

E-mail address: [nwzhu@sjtu.edu.cn](mailto:nwzhu@sjtu.edu.cn);

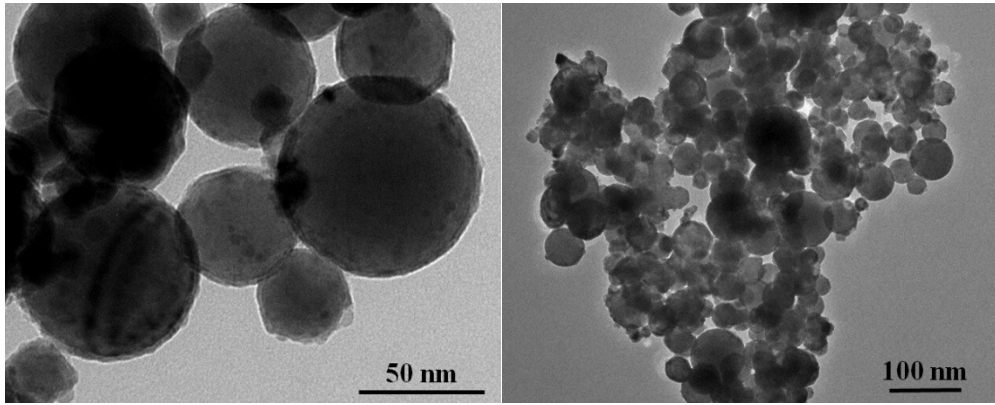

Fig. S1

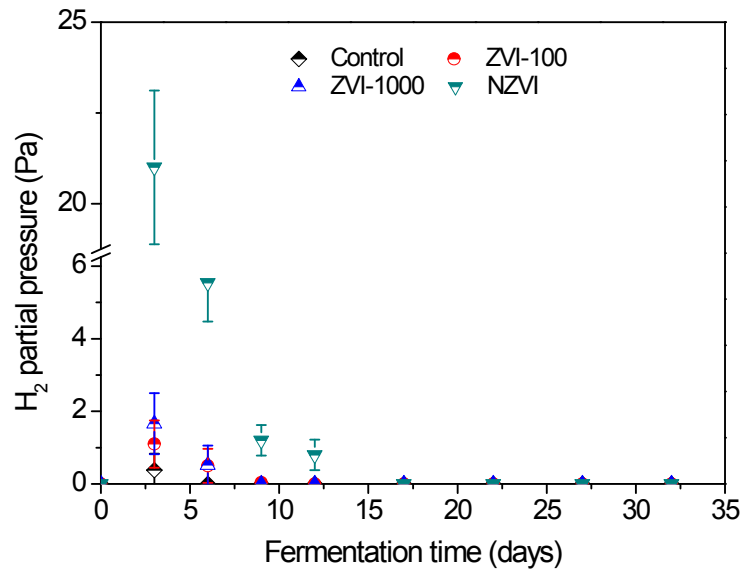

Fig. S2

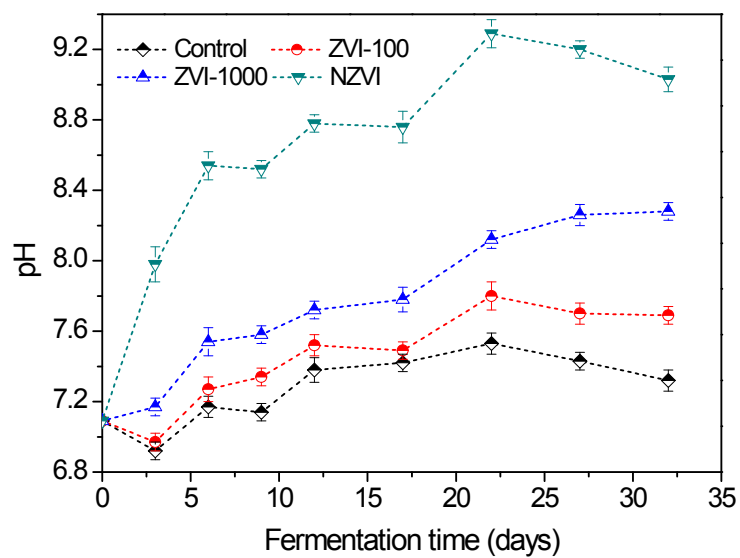

**Fig. S3**

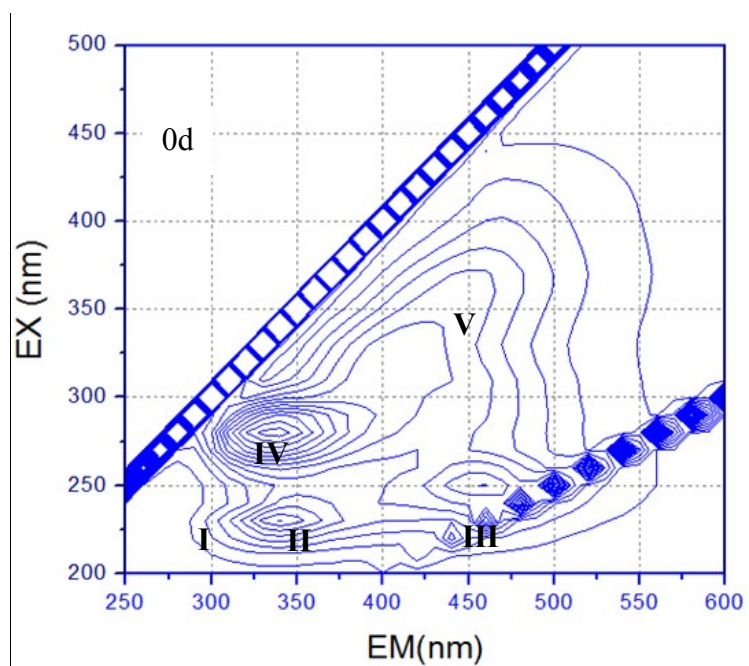

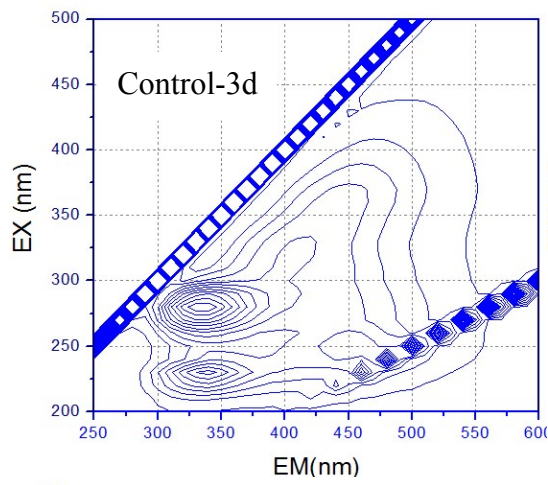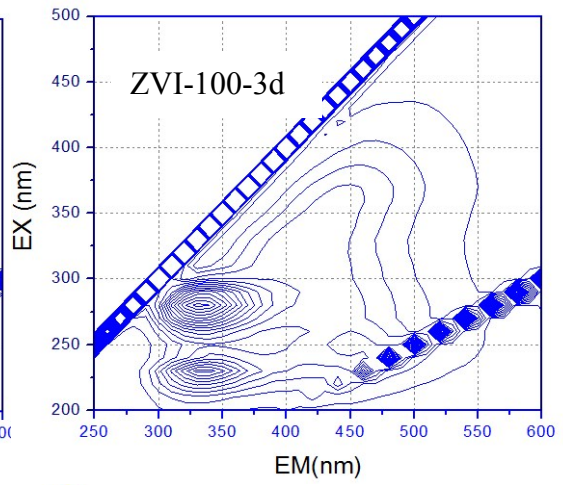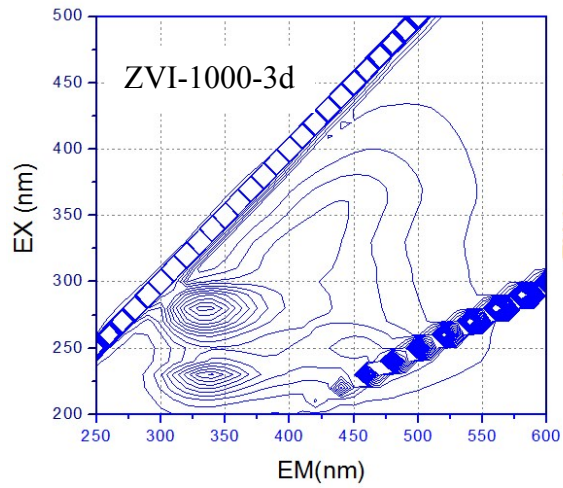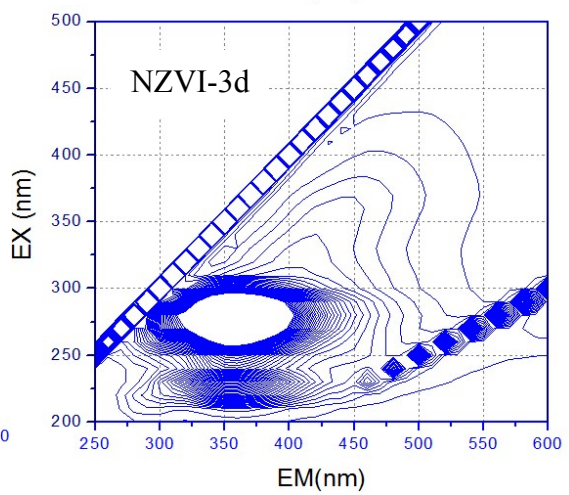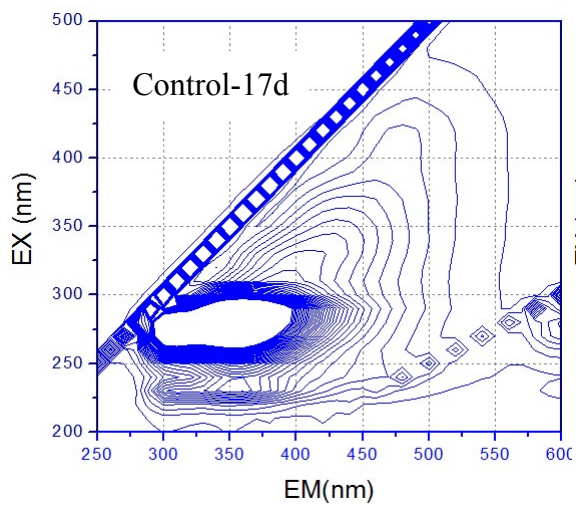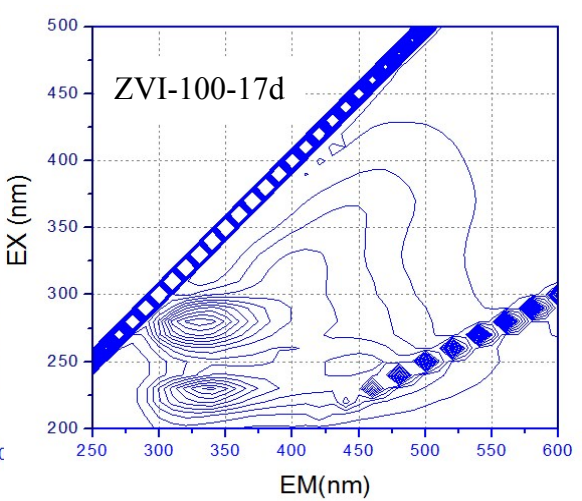



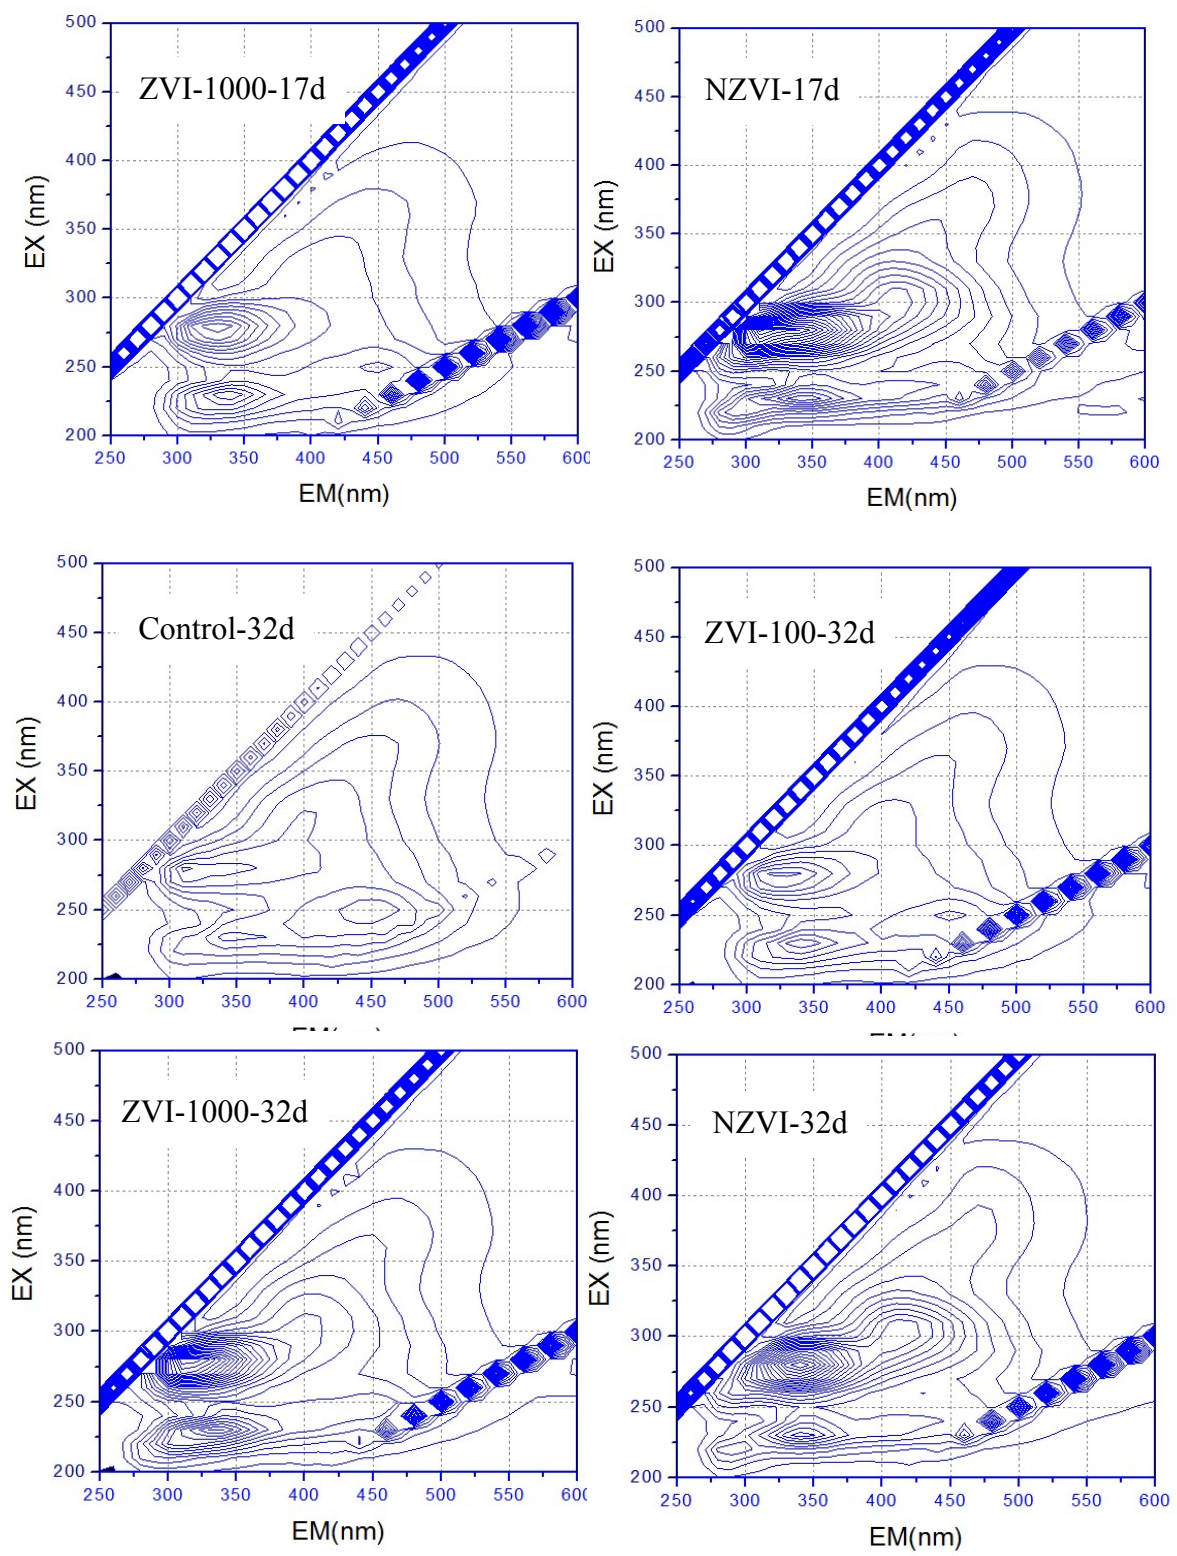

**Fig. S4**
